# Supplementary material
Source: PubMed Central journal article supplement (PMC11107705)
Supplement: 18_2017_2461_MOESM2_ESM.pdf [file 18_2017_2461_MOESM2_ESM.pdf]

## ESM\_2: Membrane-traversing mechanism of thyroid hormone transport by monocarboxylate transporter 8

Cellular and Molecular Life Sciences

J. Protze, D. Braun, K.M. Hinz, D. Bayer-Kusch, U. Schweizer and G. Krause

mail to GKrause@fmp-Berlin.de

Location, conservation and corresponding residues in MCT10 of the substituted amino acids in MCT8

| Location in Modell | Residues in MCT8 | Conservation in MCT8 | Corresponding residues in human MCT10 | Remarks                                                                                               |
|--------------------|------------------|----------------------|---------------------------------------|-------------------------------------------------------------------------------------------------------|
| TMH 5              | S313             | 100%                 | S210                                  |                                                                                                       |
| TMH 5              | S314             | 93%                  | S211                                  |                                                                                                       |
| ICL3               | R388             | 100%                 | A286                                  | inconclusive since intracellular loop strongly differs                                                |
| TMH7b              | K418             | 98%                  | K316                                  |                                                                                                       |
| TMH7b              | Y419             | 99%                  | H317                                  | might contribute to the different substrate spectra of MCT8 and MCT10 (Johannes <i>et al.</i> , 2016) |
| TMH7b              | E422             | 91%                  | E320                                  |                                                                                                       |
| TMH7b              | E423             | 92%                  | R321                                  | both capable of interacting with amino acid moiety of substrate                                       |
| TMH10b             | T503             | 100%                 | S401                                  | similar physical and chemical properties                                                              |

To calculate conservation of the residues, the 100 closest orthologs to human MCT8 were identified via a Blast search and subsequently a multiple sequence alignment was generated with ClustalW2. Scores were calculated with ClustalX2 utilizing the residue identity.
